# Supplementary material for: Asymmetric reduction of ketones and β-keto esters by (S)-1-phenylethanol dehydrogenase from denitrifying bacterium Aromatoleum aromaticum
Source: PubMed Central journal article supplement (PMC4445480; doi:10.1007/s00253-014-6309-z), 2014-12-31
Supplement: 253_2014_6309_MOESM1_ESM.pdf [file 253_2014_6309_MOESM1_ESM.pdf]

## Supplementary Information

**Asymmetric reduction of ketones and  $\beta$ -keto esters by (*S*)-1-phenylethanol dehydrogenase from denitrifying bacterium *Aromatoleum aromaticum***

A. Dudzik<sup>a</sup>, W. Snoch<sup>a,b</sup>, P. Borowiecki<sup>c</sup>, J. Opalinska-Piskorz<sup>a</sup>, M. Witko<sup>a</sup>, J. Heider<sup>d</sup>, M. Szalaniec<sup>a\*</sup>

[a] Jerzy Haber Institute of Catalysis and Surface Chemistry Polish Academy of Sciences, Niezapominajek 8, 30-239 Kraków, Poland \*Maciej Szalaniec: Fax: (+48)124251923 E-mail: ncszalen@cyfronet.pl

[b] Cracow University of Technology, Faculty of Chemical Engineering and Technology, Department of Biotechnology and Physical Chemistry, Warszawska 24 St. 31-155 Krakow, Poland

[c] Warsaw University of Technology, Faculty of Chemistry, Noakowskiego 3, 00-664 Warsaw, Poland.

[d] Laboratory for Microbial Biochemistry, Philipps University of Marburg, Karl-von-Frisch Strasse 8, D-35043 Marburg, Germany

Table S1 HPLC/MS data of alcohol products including their normal phase APCI mass signals, retention times based on UV-Vis detection (RT/UV-Vis) and IPA/n-hexane mobile phase composition

| No                      | product                                                                                                         | + NP-APCI               | RT/UV-vis | IPA/n-hexane |
|-------------------------|-----------------------------------------------------------------------------------------------------------------|-------------------------|-----------|--------------|
| <b>aromatic ketones</b> |                                                                                                                 |                         |           |              |
| 1                       | 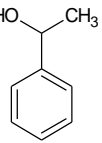<br>1-phenylethanol          | n.d.                    | 13.81     | 10/90        |
| 2                       | <br>1-phenylpropan-1-ol      | [M-OH] <sup>+</sup> 119 | 12.73     | 10/90        |
| 3                       | <br>2-chloro-1-phenylethanol | n.d.                    | 12.66     | 15/85        |

|   |                                                                                                                                      |                                                                     |       |       |
|---|--------------------------------------------------------------------------------------------------------------------------------------|---------------------------------------------------------------------|-------|-------|
|   |                                                                                                                                      |                                                                     |       |       |
| 4 | 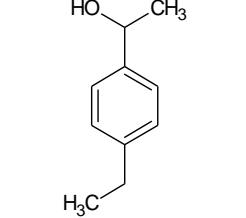 <p>1-(4-ethylphenyl)ethanol</p>                    | [M-OH] <sup>+</sup> 133                                             | 9.91  | 10/90 |
| 5 |  <p>1-(4-(1-hydroxy-ethyl)-phenyl)-ethanol</p>      | [M-OH] <sup>+</sup> 133<br>[M-H <sub>2</sub> O-OH] <sup>+</sup> 131 | 22.33 | 10/90 |
| 6 |  <p>1-(4-(1-hydroxy-ethyl)-phenyl)-ethanol</p>     | [M-OH] <sup>+</sup> 133<br>[M-H <sub>2</sub> O-OH] <sup>+</sup> 131 | 22.33 | 10/90 |
| 7 |  <p>1-(biphenyl-4-yl)ethanol</p>                  | [M-OH] <sup>+</sup> 181                                             | 17.64 | 10/90 |
| 8 |  <p>4-(1-hydroxyethyl)phenyl methanesulfonate</p> | [M-OH] <sup>+</sup> 199                                             | 25.25 | 30/70 |

|    |                                                                                                                       |                             |       |       |
|----|-----------------------------------------------------------------------------------------------------------------------|-----------------------------|-------|-------|
| 9  | 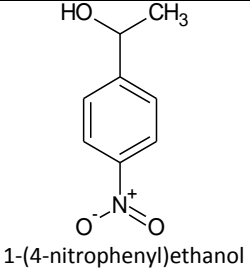 <p>1-(4-nitrophenyl)ethanol</p>     | [M] <sup>+</sup> 168        | 13.00 | 20/80 |
| 10 |  <p>1-(4-fluorophenyl)ethanol</p>    | [M-OH] <sup>+</sup> 123     | 11.37 | 10/90 |
| 11 |  <p>3-[(1-1-hydroxyethyl)phenol]</p> | [M-OH] <sup>+</sup> 121     | 18.00 | 10/90 |
| 12 |  <p>1-(3-methylphenyl)ethanol</p>   | [M-OH] <sup>+</sup> 106     | 10.97 | 10/90 |
| 13 |  <p>1-indanol</p>                  | [M-OH] <sup>+</sup> SIM 117 | 11.79 | 20/80 |
| 14 |  <p>1-(furan-2-yl)ethanol</p>      | [M-OH] <sup>+</sup> 95      | 17.02 | 10/90 |
| 15 |  <p>1-(pyridin-3-yl)ethanol</p>    | [M] <sup>+</sup> 124        | 12.34 | 15/85 |

|    |                                                                                                                             |                         |                |       |
|----|-----------------------------------------------------------------------------------------------------------------------------|-------------------------|----------------|-------|
| 16 | 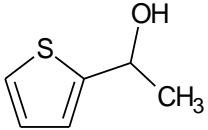 <p>1-(thiophen-2-yl)ethanol</p>           | [M-OH] <sup>+</sup> 111 | 17.25          | 10/90 |
| 17 |  <p>1-(pyridin-2-yl)ethanol</p>            | [M-OH] <sup>+</sup> 106 | 10.86          | 10/90 |
| 18 |  <p>1-(pyridin-4-yl)ethanol</p>            | [M] <sup>+</sup> 124    | 13.60          | 15/85 |
| 19 |  <p>1,2,3,4-tetrahydronaphthalen-1-ol</p> | [M-OH] <sup>+</sup>     | 12.40          | 15/85 |
| 20 |  <p>1-(4-methoxyphenyl)ethanol</p>       | [M-OH] <sup>+</sup> 135 | 14.39          | 25/75 |
| 21 |  <p>1-(4-aminophenyl)ethanol</p>         | 118                     | 23.64<br>26.64 | 30/70 |
| 22 |  <p>4-(1-hydroxyethyl)phenol</p>         | [M-OH] <sup>+</sup> 121 | 24.04 27.24    | 10/90 |

|    |                                                                                                                               |                            |       |       |
|----|-------------------------------------------------------------------------------------------------------------------------------|----------------------------|-------|-------|
| 23 | 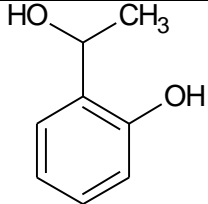 <p>2-(1-hydroxyethyl)phenol</p>             | [M-OH] <sup>+</sup> 121    | 14.49 | 10/90 |
| 24 |  <p>(S)-3-phenyl-1-indanol</p>               | [M-OH] <sup>+</sup><br>147 | 12.72 | 10/90 |
| 25 |  <p>2,3-dihydro-1H-indene-1,6-diol</p>       | [M-OH] <sup>+</sup> 133    | 18.52 | 10/90 |
| 26 |  <p>1-(2-fluorophenyl)ethanol</p>           | [M-OH] <sup>+</sup> 123    | 10.53 | 10/90 |
| 27 |  <p>2,2-dichloro-1-phenylethanol</p>       | n.d.                       | 15.06 | 10/90 |
| 28 |  <p>2-chloro-1-(4-chlorophenyl)ethanol</p> | n.d.                       | 15.10 | 10/90 |
| 29 |  <p>1-phenyl-2,2,2-trifluoroethan-1-ol</p> | n.d.                       | 11.27 | 10/90 |

|    |                                                                                                                             |                      |       |       |
|----|-----------------------------------------------------------------------------------------------------------------------------|----------------------|-------|-------|
| 30 | 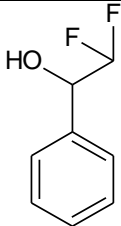 <p>1-phenyl-2,2-trifluoroethan-1-ol</p>   | n.d.                 | 16.75 | 10/90 |
| 31 |  <p>2-fluoro-1-phenylethan-1-ol</p>        | n.d.                 | 16.00 | 10/90 |
| 32 |  <p>1-(3-aminophenyl)ethanol</p>           | n.d.                 | 15.97 | 35/65 |
| 33 |  <p>1-(4-chlorophenyl)ethanol</p>         | n.d.                 | 9.38  | 15/85 |
| 34 |  <p>1-(4-bromophenyl)ethanol</p>         | n.d.                 | 9.62  | 15/85 |
| 35 |  <p>4-(1-hydroxyethyl)benzotrile</p>     | [M] <sup>+</sup> 148 | 15.13 | 15/85 |
| 36 |  <p>3-hydroxy-3-phenylpropanenitrile</p> | [M] <sup>+</sup> 148 | 17.78 | 20/80 |

|                      |                                                                                                                        |                            |       |       |
|----------------------|------------------------------------------------------------------------------------------------------------------------|----------------------------|-------|-------|
| 37                   | 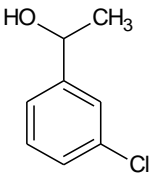<br>1-(3-chlorophenyl)ethanol         | n.d.                       | 9.96  | 15/85 |
| 38                   | <br>1-(3-methoxyphenyl)ethanol        | n.d.                       | 16.81 | 15/85 |
| 39                   | <br>2,3-dihydro-1-benzofuran-3-ol     | n.d.                       | 10.51 | 15/85 |
| 40                   | <br>1-(3-fluorophenyl)ethanol        | [M-OH] <sup>+</sup> 123    | 11.20 | 10/90 |
| 41                   | <br>1-(3-bromophenyl)ethanol        | n.d.                       | 10.76 | 15/85 |
| 42                   | <br>( <i>R</i> )-3-phenyl-1-indanol | [M-OH] <sup>+</sup><br>147 | 14.23 | 10/90 |
| <b>β-keto esters</b> |                                                                                                                        |                            |       |       |

|    |                                                                                                                                           |      |       |       |
|----|-------------------------------------------------------------------------------------------------------------------------------------------|------|-------|-------|
| 43 | 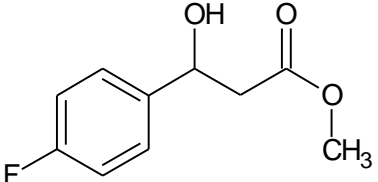 <p>methyl 3-(4-fluorophenyl)-3-hydroxypropanoate</p>    | n.d. | 13.38 | 25/75 |
| 44 |  <p>methyl 3-(4-chlorophenyl)-3-hydroxypropanoate</p>    | n.d. | 13.45 | 25/75 |
| 45 |  <p>methyl 3-(4-bromophenyl)-3-hydroxypropanoate</p>     | n.d. | 14.21 | 25/75 |
| 46 |  <p>methyl 3-hydroxy-3-(4-methoxyphenyl)propanoate</p>  | n.d. | 21.60 | 30/70 |
| 47 |  <p>methyl 3-(3-bromophenyl)-3-hydroxypropanoate</p>   | n.d. | 19.3  | 25/75 |
| 48 |  <p>methyl 3-hydroxy-3-(3-methoxyphenyl)propanoate</p> | n.d. | 31.64 | 30/70 |
| 49 |  <p>methyl 3-(3-chlorophenyl)-3-hydroxypropanoate</p>  | n.d. | 16.75 | 25/75 |



|    |                                                                                                                                        |      |       |       |
|----|----------------------------------------------------------------------------------------------------------------------------------------|------|-------|-------|
| 50 | 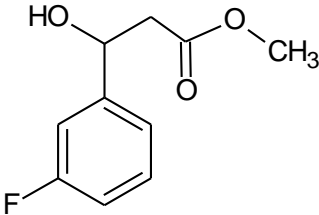 <p>methyl 3-(3-fluorophenyl)-3-hydroxypropanoate</p> | n.d. | 12.44 | 25/75 |
| 51 |  <p>methyl 3-hydroxy-3-(4-methylphenyl)propanoate</p> | n.d. | 12.05 | 30/70 |
| 52 |  <p>methyl 3-(4-ethylphenyl)-3-hydroxypropanoate</p> | n.d. | 11.86 | 20/80 |
| 53 |  <p>methyl 3-hydroxy-3-phenylpropanoate</p>         | n.d. | 15.47 | 20/80 |

Table S2 List of compounds

| <b>Chemical name and purity</b>                                | <b>Supplier</b> |
|----------------------------------------------------------------|-----------------|
| 1-phenylethanol, 98%                                           | Aldrich         |
| ( <i>S</i> )-1-phenylethanol, 98.5%                            | Fluka           |
| ( <i>R</i> )-1-phenylethanol, 97%                              | Aldrich         |
| 1-phenylpropan-1-ol, 97%                                       | Aldrich         |
| ( <i>S</i> )-1-phenylpropan-1-ol, 99%                          | Aldrich         |
| 1-phenylprop-2-en-1-ol 99%                                     | Aldrich         |
| ( <i>R</i> )-1-phenylprop-2-en-1-ol, 95%                       | Aldrich         |
| 1-phenylprop-2-yn-1-ol, 98%                                    | Alfa Aesar      |
| 1-(4-methylphenyl)ethanol, $\geq 97.0\%$                       | Aldrich         |
| 1-(4-fluorophenyl)ethanol, 97%                                 | Alfa Aesar      |
| ( <i>S</i> )-1-(4-fluorophenyl)ethanol , 97%                   | Aldrich         |
| 1-(4-methoxyphenyl)ethanol, 95%                                | Alfa Aesar      |
| 1-(2-methylphenyl)ethanol, 98%                                 | Alfa Aesar      |
| 2,3-dihydro-1 <i>H</i> -inden-1-ol, 98%                        | Aldrich         |
| ( <i>S</i> )-2,3-dihydro-1 <i>H</i> -inden-1-ol, 99%           | Fluka           |
| 1,2,3,4-tetrahydronaphthalen-1-ol, 97%                         | Aldrich         |
| ( <i>S</i> )-1,2,3,4-tetrahydronaphthalen-1-ol ,99%            | Aldrich         |
| ( <i>S</i> )-1,2,3,4-tetrahydronaphthalen-1-ol , $\geq 99.0\%$ | Fluka           |
| 1-(furan-2-yl)etanol, $\geq 99.0\%$                            | Aldrich         |
| ( <i>S</i> )-1-(furan-2-yl)ethanol, 94%                        | Fluka           |
| ( <i>S</i> )-1-(thiophen-2-yl)ethanol, $\geq 99.0\%$           | Aldrich         |
| ( <i>R</i> )-1-(thiophen-2-yl)ethanol, $\geq 98.5\%$           | Fluka           |
| 1-([1,1'-biphenyl]-4-yl)ethanol, 97%                           | Aldrich         |

Table S3 Descriptors for *para*-substituted substrates used in ANN modeling. Strong electron withdrawing effects of the substituent (positive  $\sigma_p$ ) are proportional to more negative  $\Delta\Delta G$  values of alkoxy anion formation (reference  $\Delta G$  calculated for acetophenone -264.4 kJ/mol) – see Fig. S1 of the Supplementary Information.

| -R                               | $\sigma_p$ | $\Delta\Delta G^{\text{alkoxy}}$<br>[kJ/mol] | Log K  | Log P | MR     |
|----------------------------------|------------|----------------------------------------------|--------|-------|--------|
| -OH                              | -0.37      | 7.32                                         | -3.745 | 1.35  | 38.155 |
| -OCH <sub>3</sub>                | -0.27      | 9.49                                         | -3.824 | 9.88  | 42.924 |
| -C <sub>2</sub> H <sub>5</sub>   | -0.15      | 2.15                                         | -3.045 | 2.507 | 46.103 |
| -H                               | 0.00       | 0                                            | -2.620 | 1.58  | 36.461 |
| -F                               | 0.06       | -10.2                                        | -2.066 | 1.72  | 36.677 |
| -Br                              | 0.23       | -26.44                                       | -1.638 | 2.43  | 44.084 |
| -Cl                              | 0.23       | -24.95                                       | -1.658 | 2.32  | 41.266 |
| -SO <sub>3</sub> CH <sub>3</sub> | 0.33       | -22.6                                        | -2.464 | 1.217 | 45.81  |
| -NO <sub>2</sub>                 | 0.78       | -66.19                                       | -0.592 | 1.53  | 43.786 |

Table S4 Calculated interaction energies of acetophenone in PEDH active site in Prelog and anti-Prelog positions.

| Residue  | Interaction Energy (kJ/mol) | VDW Interaction Energy (kJ/mol) | Electrostatic Interaction Energy (kJ/mol) | Interaction Energy (kJ/mol) | VDW Interaction Energy (kJ/mol) | Electrostatic Interaction Energy (kJ/mol) | $\Delta$ IE (Anti-P) (kJ/mol) |
|----------|-----------------------------|---------------------------------|-------------------------------------------|-----------------------------|---------------------------------|-------------------------------------------|-------------------------------|
|          | Prelog (pro(S))             |                                 |                                           | Anti-Prelog (pro(R))        |                                 |                                           |                               |
| B_GLY14  | 0.000                       | 0.000                           | 0.000                                     | 0.000                       | 0.000                           | 0.000                                     | 0.000                         |
| B_GLY18  | 0.042                       | -0.004                          | 0.042                                     | 0.000                       | 0.000                           | 0.000                                     | -0.042                        |
| B_ILE19  | -0.100                      | -0.176                          | 0.075                                     | -0.192                      | -0.071                          | -0.121                                    | -0.088                        |
| B_GLY20  | -0.042                      | 0.000                           | -0.042                                    | 0.000                       | 0.000                           | 0.000                                     | 0.042                         |
| B_ASN88  | 0.000                       | 0.000                           | 0.000                                     | 0.000                       | 0.000                           | 0.000                                     | 0.000                         |
| B_ASN89  | -0.046                      | -0.013                          | -0.029                                    | 0.828                       | 0.000                           | 0.828                                     | 0.874                         |
| B_ALA90  | -0.142                      | -0.004                          | -0.138                                    | -0.004                      | 0.000                           | -0.004                                    | 0.138                         |
| B_GLY91  | 0.000                       | -0.050                          | 0.050                                     | 0.084                       | -0.008                          | 0.092                                     | 0.084                         |
| B_ILE92  | -0.063                      | -0.201                          | 0.138                                     | -0.004                      | -0.071                          | 0.067                                     | 0.059                         |
| B_TYR93  | -8.745                      | -8.586                          | -0.159                                    | -1.920                      | -1.879                          | -0.042                                    | 6.828                         |
| B_PRO94  | -0.088                      | -0.121                          | 0.038                                     | -0.105                      | -0.109                          | 0.000                                     | -0.021                        |
| B_LEU95  | -0.075                      | -0.188                          | 0.113                                     | -0.523                      | -0.276                          | -0.247                                    | -0.448                        |
| B_ILE96  | -0.042                      | 0.000                           | -0.042                                    | 0.071                       | -0.013                          | 0.084                                     | 0.117                         |
| B_THR109 | -0.021                      | 0.000                           | -0.021                                    | -0.038                      | 0.000                           | -0.038                                    | -0.017                        |
| B_PHE110 | 0.000                       | 0.000                           | 0.000                                     | 0.000                       | 0.000                           | 0.000                                     | 0.000                         |
| B_ILE112 | 0.000                       | 0.000                           | 0.000                                     | 0.000                       | 0.000                           | 0.000                                     | 0.000                         |
| B_ASN113 | 0.071                       | -0.025                          | 0.096                                     | -0.146                      | -0.008                          | -0.138                                    | -0.218                        |
| B_VAL114 | 0.000                       | 0.000                           | 0.000                                     | 0.000                       | 0.000                           | 0.000                                     | 0.000                         |
| B_SER116 | 0.000                       | 0.000                           | 0.000                                     | 0.000                       | 0.000                           | 0.000                                     | 0.000                         |
| B_ASN138 | 0.046                       | 0.000                           | 0.046                                     | -0.013                      | 0.000                           | -0.013                                    | -0.059                        |
| B_LEU139 | 0.075                       | -0.054                          | 0.130                                     | -0.067                      | -0.033                          | -0.038                                    | -0.146                        |
| B_THR140 | 0.004                       | -0.293                          | 0.297                                     | -0.226                      | -0.251                          | 0.025                                     | -0.230                        |
| B_SER141 | -10.142                     | -4.833                          | -5.314                                    | -9.406                      | -5.556                          | -3.849                                    | 0.736                         |
| B_THR142 | -5.619                      | -5.017                          | -0.598                                    | -4.058                      | -3.992                          | -0.071                                    | 1.556                         |
| B_THR143 | -10.510                     | -9.728                          | -0.782                                    | -10.309                     | -10.381                         | 0.071                                     | 0.201                         |
| B_TYR144 | -0.180                      | -0.205                          | 0.029                                     | -0.326                      | -0.209                          | -0.117                                    | -0.146                        |
| B_TRP145 | -0.460                      | -0.163                          | -0.297                                    | -0.418                      | -0.142                          | -0.276                                    | 0.042                         |
| B_LEU146 | -4.975                      | -5.029                          | 0.054                                     | -2.021                      | -2.109                          | 0.088                                     | 2.950                         |
| B_ILE148 | -5.335                      | -5.485                          | 0.146                                     | -5.870                      | -5.870                          | 0.000                                     | -0.536                        |
| B_GLU149 | -0.268                      | -0.071                          | -0.197                                    | -0.715                      | -0.251                          | -0.464                                    | -0.444                        |
| B_ALA150 | -0.117                      | -0.033                          | -0.084                                    | -0.100                      | -0.126                          | 0.025                                     | 0.017                         |
| B_TYR151 | -4.125                      | -3.971                          | -0.155                                    | -5.561                      | -5.402                          | -0.159                                    | -1.435                        |

|          |          |          |         |         |         |         |        |
|----------|----------|----------|---------|---------|---------|---------|--------|
| B_THR152 | 0.142    | -0.004   | 0.146   | 0.347   | -0.021  | 0.368   | 0.205  |
| B_HIS153 | 0.000    | -0.013   | 0.013   | -0.377  | -0.025  | -0.351  | -0.377 |
| B_TYR154 | -12.489  | -6.046   | -6.448  | -11.870 | -7.272  | -4.598  | 0.623  |
| B_ILE155 | -0.134   | -0.301   | 0.163   | -0.607  | -0.678  | 0.071   | -0.469 |
| B_SER156 | 0.155    | 0.000    | 0.155   | 0.084   | -0.004  | 0.088   | -0.067 |
| B_THR157 | -0.226   | -0.013   | -0.213  | -0.084  | -0.008  | -0.075  | 0.142  |
| B_LYS158 | -1.397   | -0.502   | -0.895  | -1.042  | -0.418  | -0.623  | 0.356  |
| B_ALA159 | 0.180    | 0.000    | 0.180   | 0.126   | 0.000   | 0.130   | -0.054 |
| B_ALA160 | 0.000    | 0.000    | 0.000   | 0.000   | 0.000   | 0.000   | 0.000  |
| B_ASN161 | -0.435   | -0.008   | -0.431  | 0.033   | -0.004  | 0.038   | 0.469  |
| B_ILE162 | -0.059   | 0.000    | -0.054  | -0.025  | 0.000   | -0.025  | 0.029  |
| B_ALA181 | 0.000    | 0.000    | 0.000   | 0.000   | 0.000   | 0.000   | 0.000  |
| B_ILE182 | -0.243   | -0.021   | -0.226  | -0.155  | -0.025  | -0.130  | 0.088  |
| B_ALA183 | -0.381   | -0.184   | -0.197  | -0.310  | -0.205  | -0.109  | 0.067  |
| B_PRO184 | -1.745   | -1.824   | 0.079   | -2.678  | -2.427  | -0.255  | -0.937 |
| B_SER185 | -5.879   | -5.573   | -0.310  | -4.000  | -4.151  | 0.151   | 1.879  |
| B_LEU186 | -17.209  | -17.154  | -0.054  | -12.824 | -12.820 | -0.004  | 4.385  |
| B_VAL187 | -1.331   | -1.284   | -0.046  | -0.862  | -0.736  | -0.126  | 0.473  |
| B_THR189 | -0.285   | -0.184   | -0.105  | -0.067  | -0.038  | -0.025  | 0.222  |
| B_THR191 | -0.485   | -0.180   | -0.305  | -0.176  | -0.033  | -0.142  | 0.310  |
| B_THR192 | -2.326   | -2.556   | 0.234   | -0.552  | -0.569  | 0.017   | 1.774  |
| B_SER195 | 0.377    | -0.251   | 0.628   | -0.201  | -0.188  | -0.013  | -0.577 |
| B_LEU197 | -11.029  | -11.205  | 0.176   | -9.146  | -9.000  | -0.146  | 1.883  |
| B_PHE201 | -0.544   | -0.381   | -0.163  | -0.594  | -0.331  | -0.264  | -0.050 |
| B_LEU204 | -3.715   | -3.820   | 0.105   | -1.858  | -2.008  | 0.151   | 1.858  |
| B_GLN215 | -0.033   | -0.167   | 0.130   | -0.452  | -0.121  | -0.331  | -0.414 |
| B_LEU220 | -0.008   | -0.029   | 0.021   | -0.021  | -0.025  | 0.004   | -0.013 |
| B_THR239 | 0.004    | 0.000    | 0.004   | 0.000   | 0.000   | 0.000   | 0.000  |
| B_ALA241 | 0.172    | -0.008   | 0.180   | -0.004  | -0.013  | 0.008   | -0.176 |
| B_VAL242 | 0.000    | -0.029   | 0.025   | 0.201   | -0.033  | 0.234   | 0.205  |
| B_ASP243 | -0.100   | -0.197   | 0.096   | -1.029  | -0.159  | -0.870  | -0.929 |
| B_MET246 | -1.435   | -1.251   | -0.184  | -0.527  | -0.707  | 0.180   | 0.908  |
| B_VAL247 | 0.105    | -0.096   | 0.201   | -0.121  | -0.084  | -0.038  | -0.226 |
| B_NAD256 | -16.774  | -16.008  | -0.761  | -5.736  | -6.402  | 0.665   | 11.033 |
| SUM      | -127.997 | -113.537 | -14.460 | -95.567 | -85.257 | -10.309 |        |

Table S5 Calculated interaction energies of 4'-hydroxyacetophenone in PEDH active site in Prelog and anti-Prelog positions.

| Residue  | Interaction Energy (kJ/mol) | VDW Interaction Energy (kJ/mol) | Electrostatic Interaction Energy (kJ/mol) | Interaction Energy (kJ/mol) | VDW Interaction Energy (kJ/mol) | Electrostatic Interaction Energy (kJ/mol) | $\Delta$ IE (AntiP-P) (kJ/mol) |
|----------|-----------------------------|---------------------------------|-------------------------------------------|-----------------------------|---------------------------------|-------------------------------------------|--------------------------------|
|          | Prelog (pro(S))             |                                 |                                           | Anti-Prelog (pro(R))        |                                 |                                           |                                |
| B_GLY14  | 0.000                       | 0.000                           | 0.000                                     | 0.000                       | 0.000                           | 0.000                                     | 0.000                          |
| B_GLY18  | 0.025                       | 0.000                           | 0.025                                     | 0.000                       | 0.000                           | 0.000                                     | -0.042                         |
| B_ILE19  | -0.092                      | -0.105                          | 0.013                                     | -0.158                      | -0.067                          | -0.091                                    | -0.059                         |
| B_GLY20  | 0.017                       | 0.000                           | 0.017                                     | 0.000                       | 0.000                           | 0.000                                     | 0.038                          |
| B_ASN88  | 0.000                       | 0.000                           | 0.000                                     | 0.000                       | 0.000                           | 0.000                                     | 0.000                          |
| B_ASN89  | 0.356                       | -0.008                          | 0.364                                     | 0.640                       | -0.001                          | 0.641                                     | 0.841                          |
| B_ALA90  | -0.092                      | 0.000                           | -0.092                                    | 0.000                       | 0.000                           | 0.000                                     | 0.138                          |
| B_GLY91  | 0.033                       | -0.050                          | 0.079                                     | 0.023                       | -0.007                          | 0.030                                     | 0.088                          |
| B_ILE92  | -0.088                      | -0.234                          | 0.146                                     | 0.008                       | -0.062                          | 0.071                                     | 0.067                          |
| B_TYR93  | -8.531                      | -8.058                          | -0.469                                    | -1.831                      | -1.584                          | -0.247                                    | 6.820                          |
| B_PRO94  | -0.172                      | -0.155                          | -0.013                                    | -0.177                      | -0.085                          | -0.092                                    | 0.029                          |
| B_LEU95  | -0.021                      | -0.238                          | 0.213                                     | -0.111                      | -0.204                          | 0.094                                     | -0.410                         |
| B_ILE96  | -0.038                      | -0.004                          | -0.038                                    | -0.124                      | -0.007                          | -0.117                                    | 0.243                          |
| B_THR109 | -0.017                      | -0.004                          | -0.013                                    | -0.039                      | -0.001                          | -0.039                                    | -0.017                         |
| B_PHE110 | 0.000                       | 0.000                           | 0.000                                     | 0.000                       | 0.000                           | 0.000                                     | 0.000                          |
| B_ILE112 | 0.004                       | 0.000                           | 0.004                                     | 0.000                       | 0.000                           | 0.000                                     | 0.000                          |
| B_ASN113 | 0.096                       | -0.029                          | 0.126                                     | -0.167                      | -0.006                          | -0.160                                    | -0.218                         |
| B_VAL114 | 0.000                       | 0.000                           | 0.000                                     | 0.000                       | 0.000                           | 0.000                                     | 0.000                          |
| B_SER116 | 0.000                       | 0.000                           | 0.000                                     | 0.000                       | 0.000                           | 0.000                                     | 0.000                          |
| B_ASN138 | 0.025                       | 0.000                           | 0.025                                     | -0.014                      | 0.000                           | -0.014                                    | -0.054                         |
| B_LEU139 | 0.050                       | -0.042                          | 0.092                                     | -0.051                      | -0.031                          | -0.020                                    | -0.134                         |
| B_THR140 | -0.075                      | -0.272                          | 0.192                                     | -0.171                      | -0.255                          | 0.083                                     | -0.285                         |
| B_SER141 | -9.109                      | -3.280                          | -5.824                                    | -8.796                      | -5.208                          | -3.588                                    | 0.473                          |
| B_THR142 | -4.435                      | -4.012                          | -0.418                                    | -4.171                      | -4.015                          | -0.156                                    | 1.255                          |
| B_THR143 | -9.899                      | -9.029                          | -0.866                                    | -10.435                     | -10.468                         | 0.033                                     | 0.096                          |
| B_TYR144 | 0.063                       | -0.188                          | 0.251                                     | -0.363                      | -0.214                          | -0.148                                    | -0.071                         |
| B_TRP145 | -0.464                      | -0.126                          | -0.339                                    | -0.431                      | -0.149                          | -0.282                                    | 0.276                          |
| B_LEU146 | -2.887                      | -2.858                          | -0.029                                    | -1.922                      | -1.979                          | 0.057                                     | 4.079                          |
| B_ILE148 | -4.828                      | -4.908                          | 0.079                                     | -5.330                      | -5.401                          | 0.072                                     | -1.100                         |
| B_GLU149 | 0.142                       | -0.088                          | 0.230                                     | -0.422                      | -0.158                          | -0.264                                    | 0.054                          |
| B_ALA150 | -0.054                      | -0.050                          | -0.004                                    | 0.000                       | -0.088                          | 0.088                                     | -0.046                         |
| B_TYR151 | -5.489                      | -5.263                          | -0.226                                    | -4.210                      | -4.072                          | -0.138                                    | -1.247                         |
| B_THR152 | 0.172                       | -0.008                          | 0.180                                     | 0.308                       | -0.016                          | 0.324                                     | 0.205                          |
| B_HIS153 | 0.259                       | -0.029                          | 0.289                                     | -0.451                      | -0.019                          | -0.432                                    | -0.602                         |

|          |          |         |         |         |         |        |        |
|----------|----------|---------|---------|---------|---------|--------|--------|
| B_TYR154 | -13.749  | -6.640  | -7.113  | -10.235 | -6.341  | -3.895 | 0.222  |
| B_ILE155 | -0.276   | -0.402  | 0.126   | -0.566  | -0.633  | 0.067  | -0.456 |
| B_SER156 | -0.067   | -0.004  | -0.063  | 0.080   | -0.003  | 0.083  | -0.079 |
| B_THR157 | 0.109    | -0.021  | 0.130   | -0.086  | -0.007  | -0.080 | 0.167  |
| B_LYS158 | -1.443   | -0.611  | -0.833  | -0.913  | -0.403  | -0.510 | 0.243  |
| B_ALA159 | 0.192    | -0.004  | 0.197   | 0.140   | -0.002  | 0.142  | -0.046 |
| B_ALA160 | 0.000    | 0.000   | 0.000   | 0.000   | 0.000   | 0.000  | 0.000  |
| B_ASN161 | -0.431   | -0.008  | -0.427  | 0.085   | -0.004  | 0.089  | 0.406  |
| B_ILE162 | -0.038   | 0.000   | -0.033  | -0.022  | -0.002  | -0.020 | 0.029  |
| B_ALA181 | 0.000    | 0.000   | 0.000   | 0.002   | 0.000   | 0.002  | 0.000  |
| B_ILE182 | -0.331   | -0.017  | -0.318  | -0.146  | -0.025  | -0.121 | 0.088  |
| B_ALA183 | -0.402   | -0.151  | -0.251  | -0.318  | -0.214  | -0.104 | 0.075  |
| B_PRO184 | -1.331   | -1.402  | 0.071   | -2.927  | -2.605  | -0.322 | -0.849 |
| B_SER185 | -3.598   | -3.640  | 0.042   | -4.264  | -4.316  | 0.052  | 1.954  |
| B_LEU186 | -13.891  | -13.895 | 0.000   | -13.332 | -13.315 | -0.017 | 4.481  |
| B_VAL187 | -0.845   | -0.828  | -0.017  | -0.746  | -0.721  | -0.026 | 0.724  |
| B_THR189 | -0.351   | -0.096  | -0.255  | -0.071  | -0.036  | -0.035 | 0.234  |
| B_THR191 | -0.255   | -0.113  | -0.142  | -0.162  | -0.029  | -0.133 | 0.339  |
| B_THR192 | -1.201   | -1.251  | 0.050   | -0.602  | -0.545  | -0.057 | 1.753  |
| B_SER195 | 0.356    | -0.222  | 0.577   | -0.178  | -0.166  | -0.012 | -0.477 |
| B_LEU197 | -10.042  | -10.188 | 0.146   | -8.315  | -8.266  | -0.048 | 0.757  |
| B_PHE201 | -0.519   | -0.310  | -0.213  | -0.510  | -0.351  | -0.158 | -0.142 |
| B_LEU204 | -2.728   | -2.820  | 0.088   | -2.015  | -2.371  | 0.356  | 2.778  |
| B_GLN215 | 0.134    | -0.126  | 0.259   | -0.428  | -0.129  | -0.298 | -0.368 |
| B_LEU220 | -0.021   | -0.017  | -0.008  | -0.051  | -0.023  | -0.027 | -0.029 |
| B_THR239 | 0.000    | 0.000   | 0.000   | 0.000   | -0.001  | 0.000  | -0.004 |
| B_ALA241 | 0.172    | -0.004  | 0.176   | -0.010  | -0.015  | 0.005  | -0.138 |
| B_VAL242 | -0.159   | -0.021  | -0.142  | 0.259   | -0.034  | 0.293  | 0.205  |
| B_ASP243 | 0.180    | -0.142  | 0.322   | -1.078  | -0.171  | -0.907 | -1.636 |
| B_MET246 | -1.021   | -0.929  | -0.092  | -0.565  | -0.778  | 0.213  | 0.582  |
| B_VAL247 | -0.054   | -0.075  | 0.021   | -0.185  | -0.091  | -0.094 | -0.105 |
| B_NAD256 | -12.862  | -12.376 | -0.490  | -5.658  | -6.322  | 0.664  | 11.033 |
| SUM      | -109.529 | -95.345 | -14.184 | -91.215 | -82.019 | -9.196 |        |

Table S6 Calculated interaction energies of 4'-aminoacetophenone in PEDH active site in Prelog and anti-Prelog positions.

| Residue  | Interaction Energy (kJ/mol) | VDW Interaction Energy (kJ/mol) | Electrostatic Interaction Energy (kJ/mol) | Interaction Energy (kJ/mol) | VDW Interaction Energy (kJ/mol) | Electrostatic Interaction Energy (kJ/mol) | $\Delta$ IE (AntiP-P) (kJ/mol) |
|----------|-----------------------------|---------------------------------|-------------------------------------------|-----------------------------|---------------------------------|-------------------------------------------|--------------------------------|
|          | Prelog (pro(S))             |                                 |                                           | Anti-Prelog (pro(R))        |                                 |                                           |                                |
| B_GLY14  | 0.000                       | 0.000                           | 0.000                                     | 0.000                       | 0.000                           | 0.000                                     | 0.000                          |
| B_GLY18  | 0.025                       | 0.000                           | 0.025                                     | 0.000                       | 0.000                           | 0.000                                     | -0.025                         |
| B_ILE19  | -0.092                      | -0.105                          | 0.013                                     | -0.159                      | -0.067                          | -0.092                                    | -0.063                         |
| B_GLY20  | 0.017                       | 0.000                           | 0.017                                     | 0.000                       | 0.000                           | 0.000                                     | -0.017                         |
| B_ASN88  | 0.000                       | 0.000                           | 0.000                                     | 0.000                       | 0.000                           | 0.000                                     | 0.000                          |
| B_ASN89  | 0.356                       | -0.008                          | 0.364                                     | 0.640                       | 0.000                           | 0.640                                     | 0.285                          |
| B_ALA90  | -0.092                      | 0.000                           | -0.092                                    | 0.000                       | 0.000                           | 0.000                                     | 0.092                          |
| B_GLY91  | 0.033                       | -0.050                          | 0.079                                     | 0.025                       | -0.008                          | 0.029                                     | -0.008                         |
| B_ILE92  | -0.088                      | -0.234                          | 0.146                                     | 0.008                       | -0.063                          | 0.071                                     | 0.096                          |
| B_TYR93  | -8.531                      | -8.058                          | -0.469                                    | -1.833                      | -1.586                          | -0.247                                    | 6.699                          |
| B_PRO94  | -0.172                      | -0.155                          | -0.013                                    | -0.176                      | -0.084                          | -0.092                                    | -0.004                         |
| B_LEU95  | -0.021                      | -0.238                          | 0.213                                     | -0.109                      | -0.205                          | 0.092                                     | -0.088                         |
| B_ILE96  | -0.038                      | -0.004                          | -0.038                                    | -0.126                      | -0.008                          | -0.117                                    | -0.084                         |
| B_THR109 | -0.017                      | -0.004                          | -0.013                                    | -0.038                      | 0.000                           | -0.038                                    | -0.021                         |
| B_PHE110 | 0.000                       | 0.000                           | 0.000                                     | 0.000                       | 0.000                           | 0.000                                     | 0.000                          |
| B_ILE112 | 0.004                       | 0.000                           | 0.004                                     | 0.000                       | 0.000                           | 0.000                                     | -0.004                         |
| B_ASN113 | 0.096                       | -0.029                          | 0.126                                     | -0.167                      | -0.008                          | -0.159                                    | -0.264                         |
| B_VAL114 | 0.000                       | 0.000                           | 0.000                                     | 0.000                       | 0.000                           | 0.000                                     | 0.000                          |
| B_SER116 | 0.000                       | 0.000                           | 0.000                                     | 0.000                       | 0.000                           | 0.000                                     | 0.000                          |
| B_ASN138 | 0.025                       | 0.000                           | 0.025                                     | -0.013                      | 0.000                           | -0.013                                    | -0.042                         |
| B_LEU139 | 0.050                       | -0.042                          | 0.092                                     | -0.050                      | -0.029                          | -0.021                                    | -0.100                         |
| B_THR140 | -0.075                      | -0.272                          | 0.192                                     | -0.172                      | -0.255                          | 0.084                                     | -0.096                         |
| B_SER141 | -9.109                      | -3.280                          | -5.824                                    | -8.795                      | -5.209                          | -3.590                                    | 0.310                          |
| B_THR142 | -4.435                      | -4.012                          | -0.418                                    | -4.171                      | -4.017                          | -0.155                                    | 0.264                          |
| B_THR143 | -9.899                      | -9.029                          | -0.866                                    | -10.435                     | -10.468                         | 0.033                                     | -0.540                         |
| B_TYR144 | 0.063                       | -0.188                          | 0.251                                     | -0.364                      | -0.213                          | -0.146                                    | -0.427                         |
| B_TRP145 | -0.464                      | -0.126                          | -0.339                                    | -0.431                      | -0.151                          | -0.280                                    | 0.033                          |
| B_LEU146 | -2.887                      | -2.858                          | -0.029                                    | -1.920                      | -1.979                          | 0.059                                     | 0.967                          |
| B_ILE148 | -4.828                      | -4.908                          | 0.079                                     | -5.330                      | -5.402                          | 0.071                                     | -0.502                         |
| B_GLU149 | 0.142                       | -0.088                          | 0.230                                     | -0.423                      | -0.159                          | -0.264                                    | -0.565                         |
| B_ALA150 | -0.054                      | -0.050                          | -0.004                                    | 0.000                       | -0.088                          | 0.088                                     | 0.054                          |
| B_TYR151 | -5.489                      | -5.263                          | -0.226                                    | -4.209                      | -4.071                          | -0.138                                    | 1.280                          |
| B_THR152 | 0.172                       | -0.008                          | 0.180                                     | 0.310                       | -0.017                          | 0.322                                     | 0.138                          |
| B_HIS153 | 0.259                       | -0.029                          | 0.289                                     | -0.452                      | -0.021                          | -0.431                                    | -0.707                         |



|          |          |         |         |         |         |        |        |
|----------|----------|---------|---------|---------|---------|--------|--------|
| B_TYR154 | -13.749  | -6.640  | -7.113  | -10.234 | -6.339  | -3.895 | 3.515  |
| B_ILE155 | -0.276   | -0.402  | 0.126   | -0.565  | -0.632  | 0.067  | -0.289 |
| B_SER156 | -0.067   | -0.004  | -0.063  | 0.079   | -0.004  | 0.084  | 0.146  |
| B_THR157 | 0.109    | -0.021  | 0.130   | -0.088  | -0.008  | -0.079 | -0.197 |
| B_LYS158 | -1.443   | -0.611  | -0.833  | -0.912  | -0.402  | -0.510 | 0.531  |
| B_ALA159 | 0.192    | -0.004  | 0.197   | 0.138   | 0.000   | 0.142  | -0.054 |
| B_ALA160 | 0.000    | 0.000   | 0.000   | 0.000   | 0.000   | 0.000  | 0.000  |
| B_ASN161 | -0.431   | -0.008  | -0.427  | 0.084   | -0.004  | 0.088  | 0.519  |
| B_ILE162 | -0.038   | 0.000   | -0.033  | -0.021  | -0.004  | -0.021 | 0.013  |
| B_ALA181 | 0.000    | 0.000   | 0.000   | 0.000   | 0.000   | 0.000  | 0.000  |
| B_ILE182 | -0.331   | -0.017  | -0.318  | -0.146  | -0.025  | -0.121 | 0.184  |
| B_ALA183 | -0.402   | -0.151  | -0.251  | -0.318  | -0.213  | -0.105 | 0.084  |
| B_PRO184 | -1.331   | -1.402  | 0.071   | -2.929  | -2.607  | -0.322 | -1.594 |
| B_SER185 | -3.598   | -3.640  | 0.042   | -4.263  | -4.318  | 0.050  | -0.665 |
| B_LEU186 | -13.891  | -13.895 | 0.000   | -13.334 | -13.313 | -0.017 | 0.561  |
| B_VAL187 | -0.845   | -0.828  | -0.017  | -0.745  | -0.720  | -0.025 | 0.096  |
| B_THR189 | -0.351   | -0.096  | -0.255  | -0.071  | -0.038  | -0.033 | 0.280  |
| B_THR191 | -0.255   | -0.113  | -0.142  | -0.163  | -0.029  | -0.134 | 0.092  |
| B_THR192 | -1.201   | -1.251  | 0.050   | -0.602  | -0.544  | -0.059 | 0.598  |
| B_SER195 | 0.356    | -0.222  | 0.577   | -0.180  | -0.167  | -0.013 | -0.536 |
| B_LEU197 | -10.042  | -10.188 | 0.146   | -8.314  | -8.268  | -0.050 | 1.724  |
| B_PHE201 | -0.519   | -0.310  | -0.213  | -0.510  | -0.351  | -0.159 | 0.008  |
| B_LEU204 | -2.728   | -2.820  | 0.088   | -2.017  | -2.372  | 0.356  | 0.715  |
| B_GLN215 | 0.134    | -0.126  | 0.259   | -0.427  | -0.130  | -0.297 | -0.565 |
| B_LEU220 | -0.021   | -0.017  | -0.008  | -0.050  | -0.025  | -0.029 | -0.029 |
| B_THR239 | 0.000    | 0.000   | 0.000   | 0.000   | 0.000   | 0.000  | 0.000  |
| B_ALA241 | 0.172    | -0.004  | 0.176   | -0.008  | -0.017  | 0.004  | -0.180 |
| B_VAL242 | -0.159   | -0.021  | -0.142  | 0.259   | -0.033  | 0.293  | 0.418  |
| B_ASP243 | 0.180    | -0.142  | 0.322   | -1.079  | -0.172  | -0.908 | -1.259 |
| B_MET246 | -1.021   | -0.929  | -0.092  | -0.565  | -0.778  | 0.213  | 0.456  |
| B_VAL247 | -0.054   | -0.075  | 0.021   | -0.184  | -0.092  | -0.096 | -0.130 |
| B_NAD256 | -12.862  | -12.376 | -0.490  | -5.657  | -6.322  | 0.665  | 7.205  |
| SUM      | -109.529 | -95.345 | -14.184 | -91.215 | -82.019 | -9.196 |        |



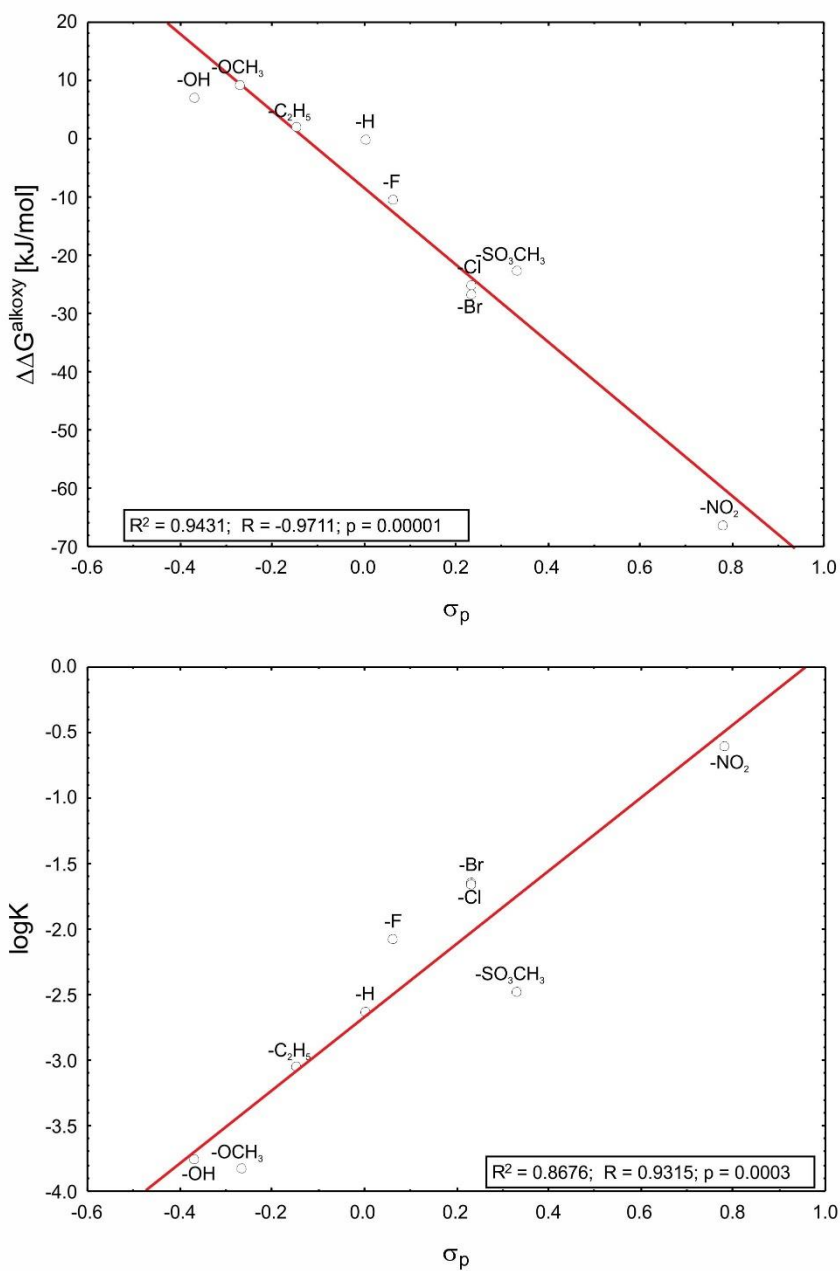

Fig. S1 Scatter plots showing linear correlations between Hammett  $\sigma_p$  values and calculated  $\Delta\Delta G^{\text{alkoxy}}$  and  $\log K$  descriptors of various PEDH substrates (see Table S1).

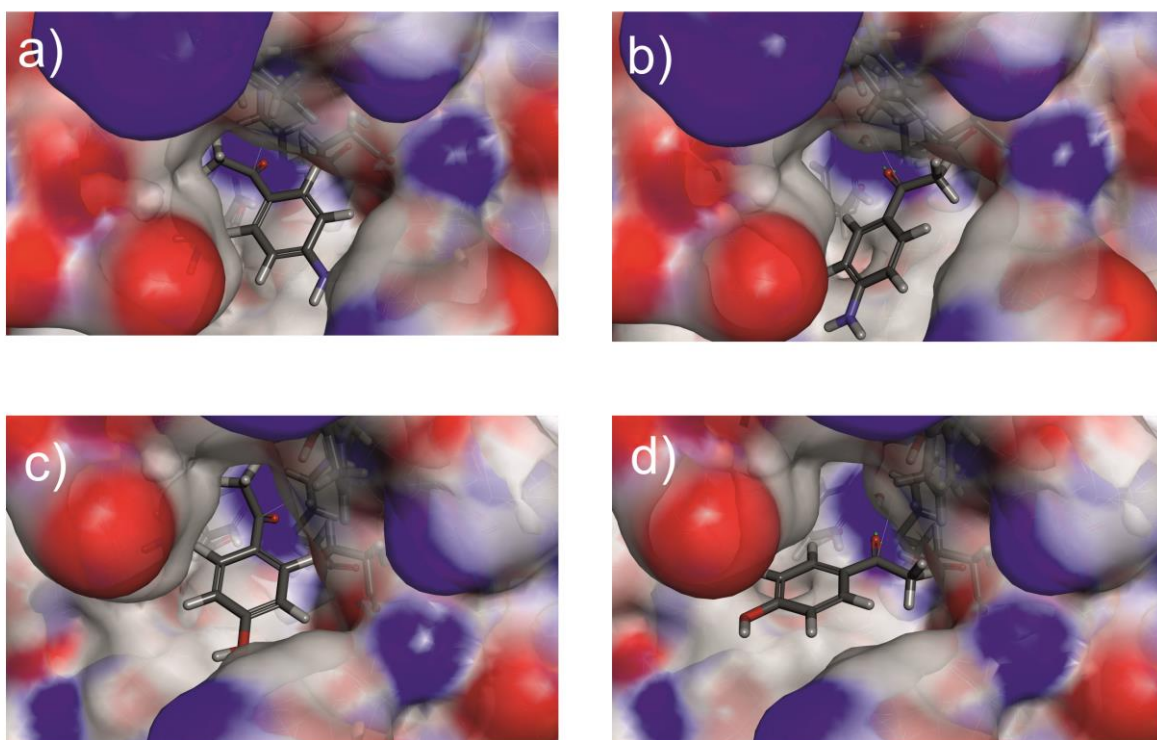

Fig. S2 Modeled ternary complexes of PEDH with bound substrate and NADH: A) Prelog orientation (Pro(*S*)) and B) anti-Prelog (Pro(*R*)) orientation of 4'-aminoacetophenone, C) Prelog orientation (Pro(*S*)) and B) anti-Prelog (Pro(*R*)) orientation of 4'-hydroxyacetophenone. The vdW surface of PEDH is colored according to the H-bond acceptor (blue) / H-bond donor (red) capabilities of the protein residues.

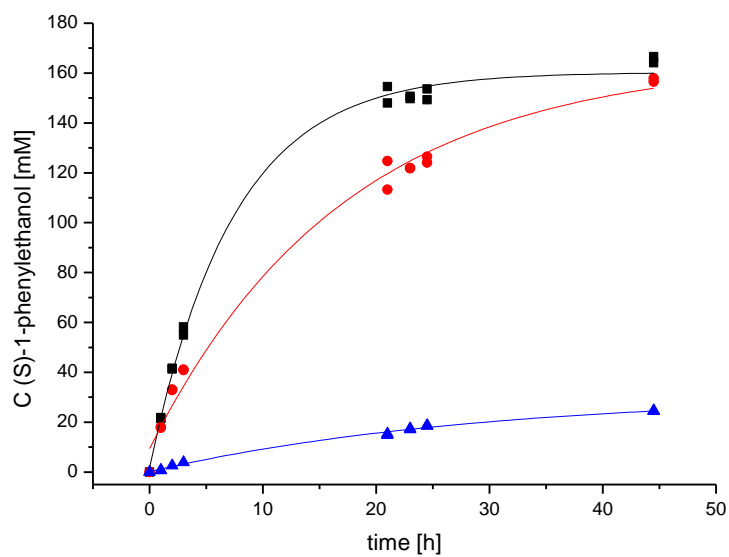

Fig. S3 The progress curves obtained for conversion of acetophenone with various concentrations of IPA: blue triangles: minimal concentration of 14% IPA, red circles: 60% IPA, black squares: 95% IPA. The reaction with 14% IPA was conducted with an initial acetophenone concentration  $C_0$  of 100 mM while reactors with 60 and 95% IPA were started with a  $C_0$  of 200 mM.

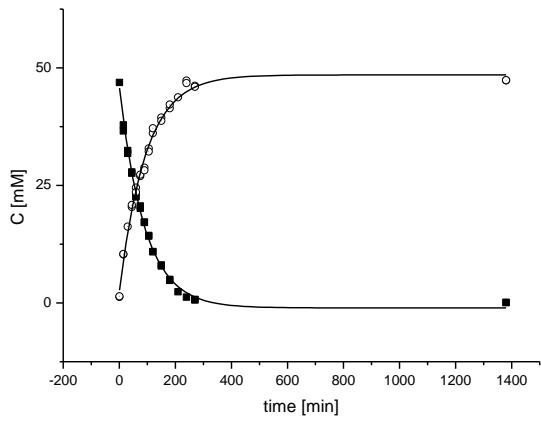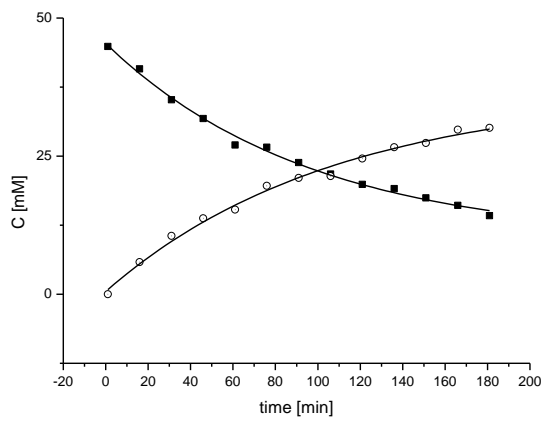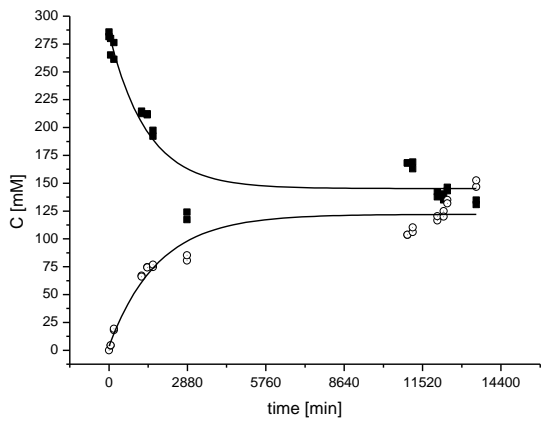

Fig. S4A Acetophenone reduction progress curves (squares - substrate, circles – product). Top: reaction with  $C_0 = 47$  mM and 45 mM, bottom: reaction with  $C_0 = 286$  mM.

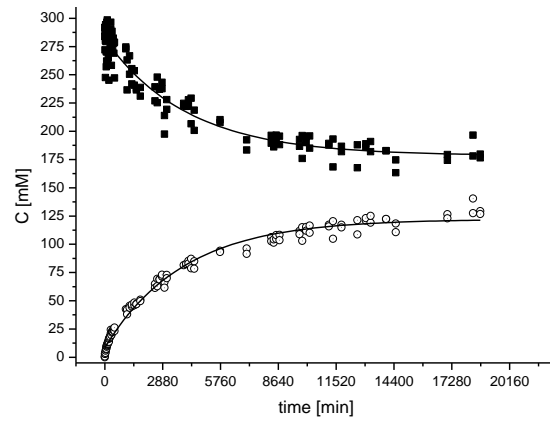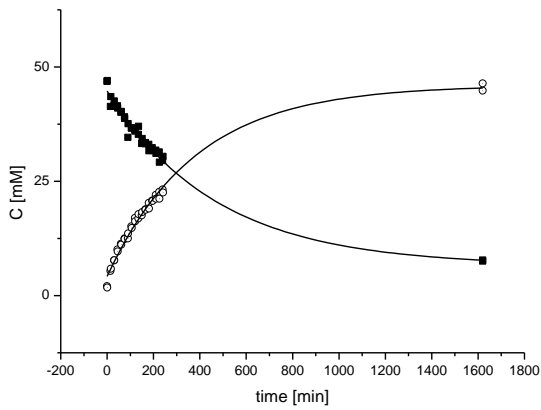

Fig. S4B *p*-ethylacetophenone reduction progress curve (squares - substrate, circles – product); left  $C_0 = 47$  mM, right: reaction with  $C_0 = 292$  mM.

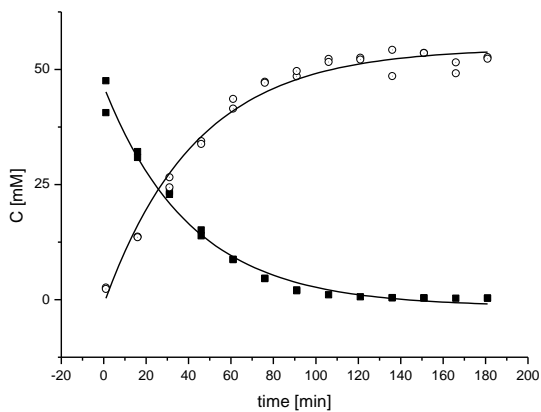

Fig. S4C 4'-acetylphenyl methanesulfonate reduction progress curve (squares - substrate, circles – product).  $C_0 = 52$  mM.

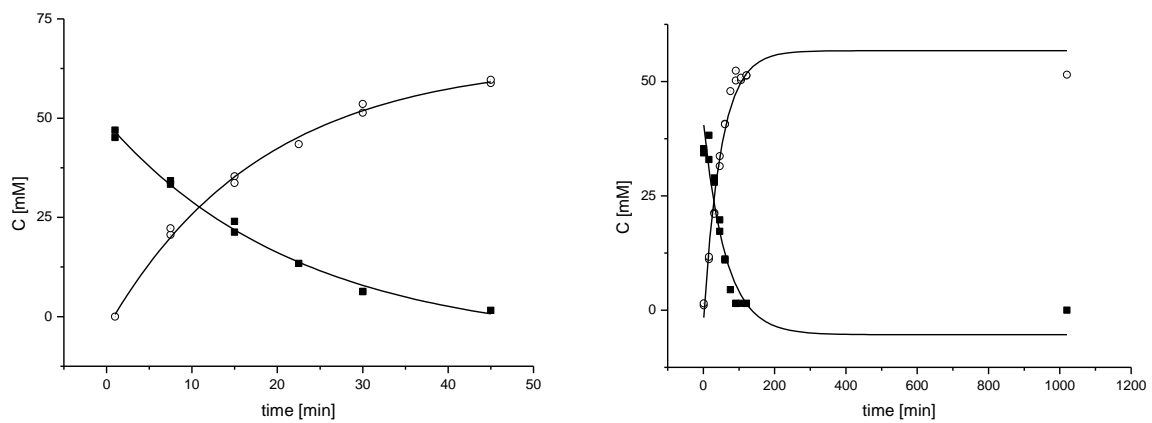

Fig. S4D  $p$ -nitroacetophenone reduction progress curves (squares - substrate, circles – product).  $C_0 = 55$  and 49 mM.



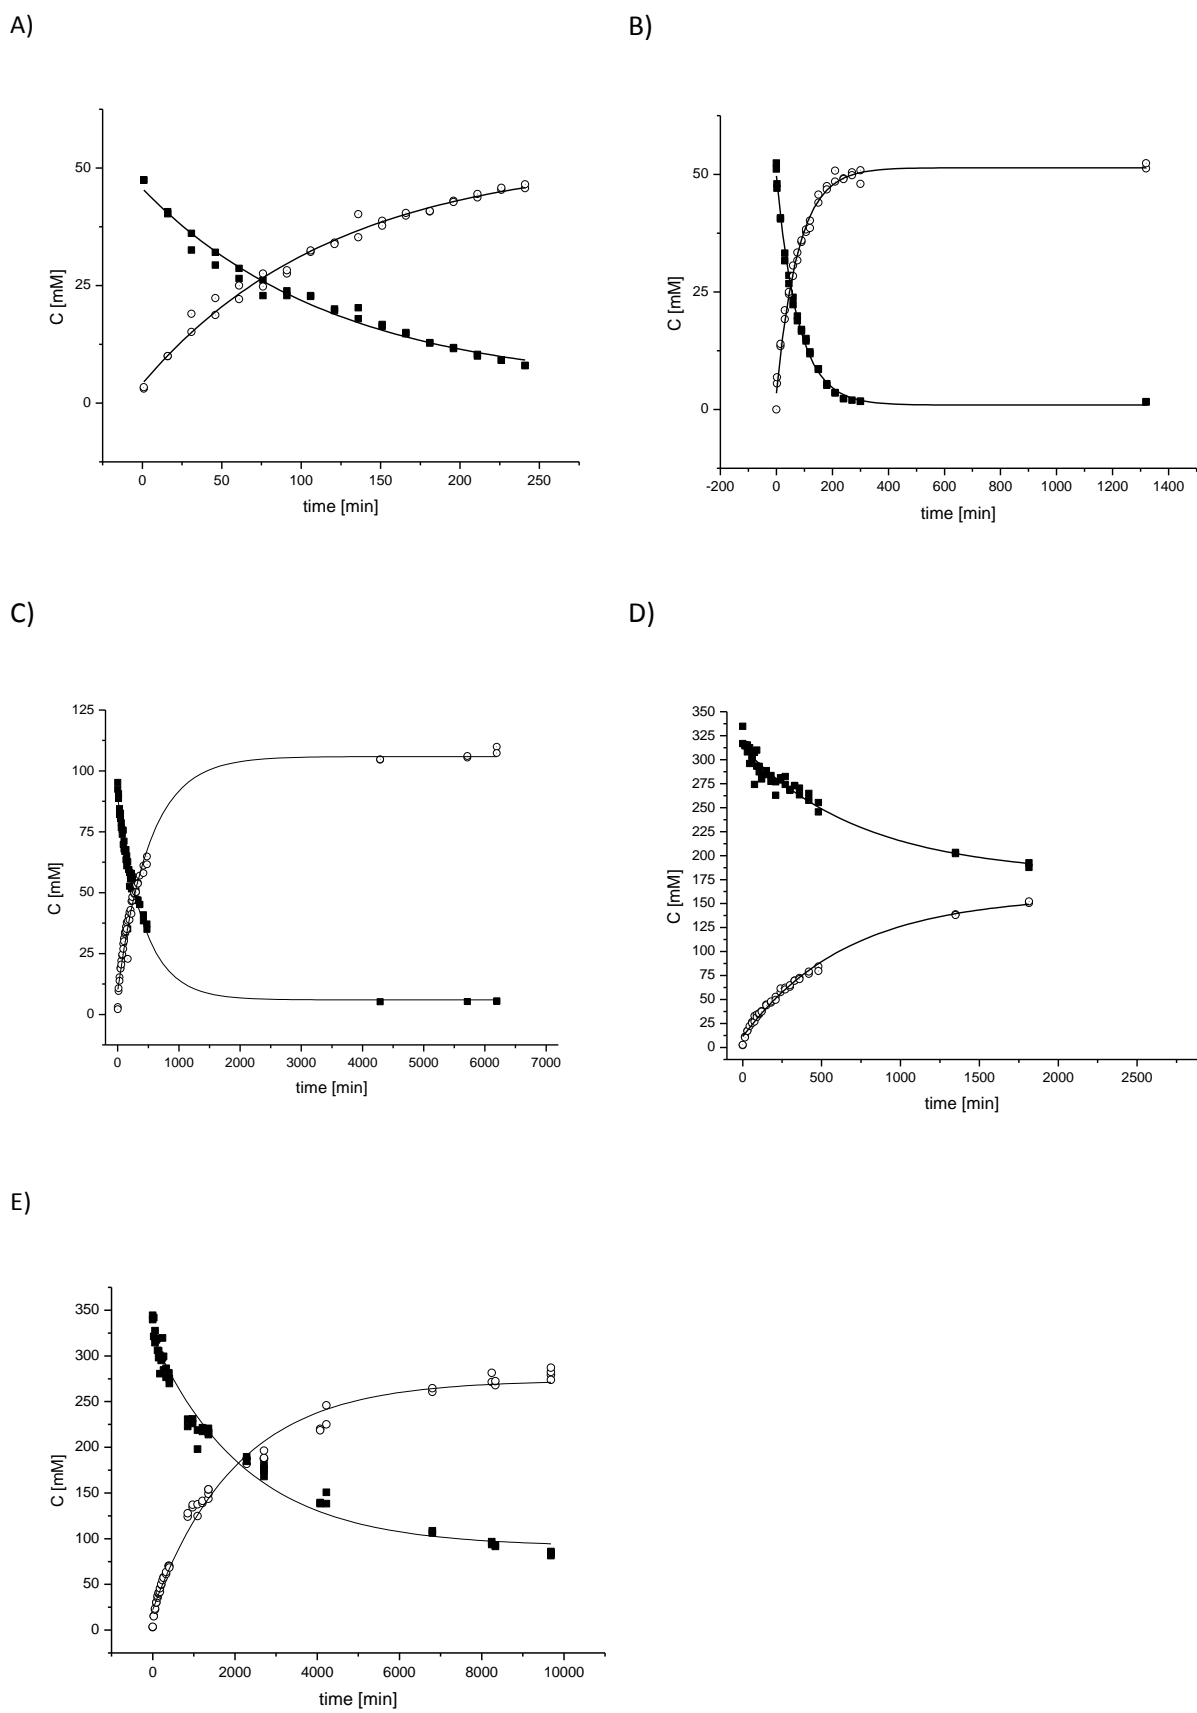

Fig. S4E *p*-Fluoroacetophenone reduction progress curves (squares - substrate, circles – product). Reactions with  $C_0 =$ : A) 47 mM , B) 50 mM ,C) 107 mM, D) 335 mM and E) 356 mM

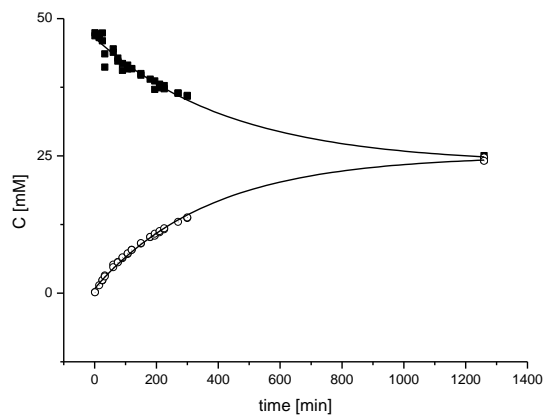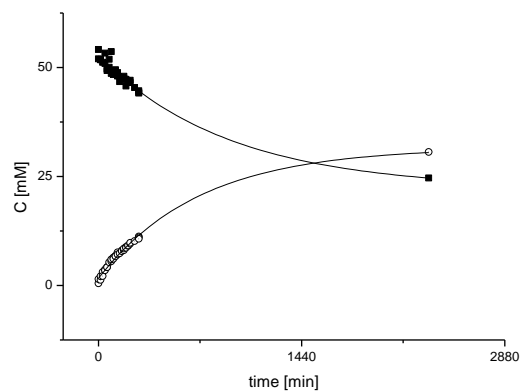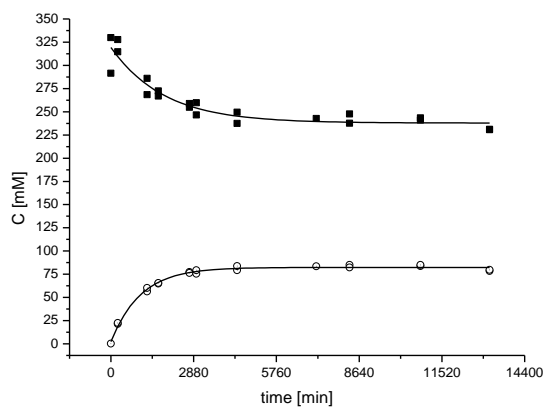

Fig. S4F  $p$ -Hydroxyacetophenone reduction progress curves (squares - substrate, circles - product). Top: reactions with  $C_0 = 47$  and  $55$  mM, bottom  $C_0 = 330$  mM.

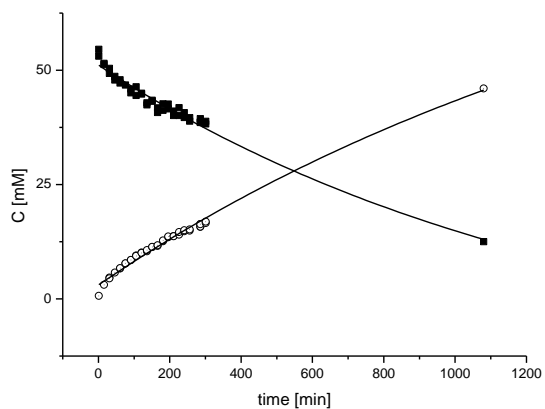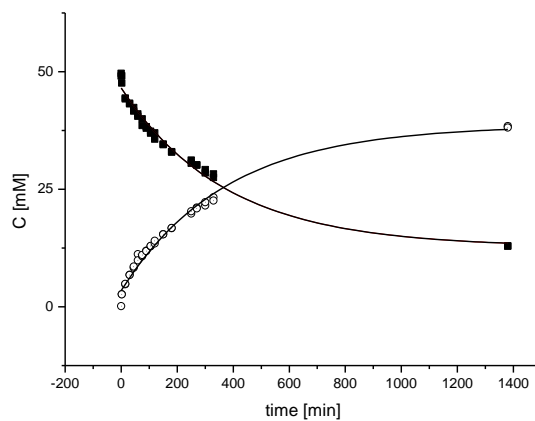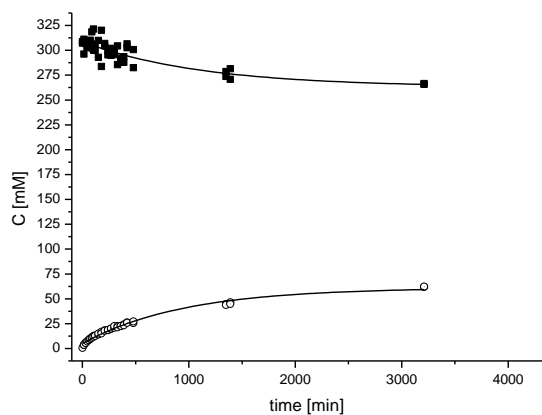

Fig. S4G  $p$ -methoxyacetophenone reduction progress curves (squares - substrate, circles – product). Top: reactions with  $C_0 = 55$  and  $49$  mM, bottom  $C_0 = 309$  mM.

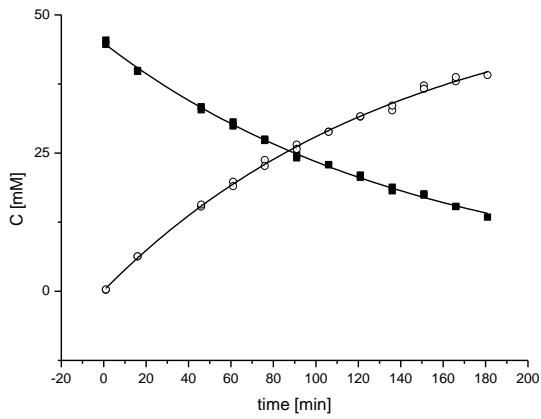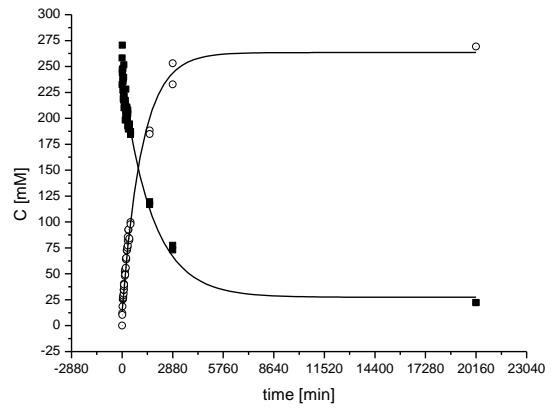

Fig. S4H *p*-Chloroacetophenone reduction progress curves (squares - substrate, circles – product) Left: reaction with  $C_0 = 45$  mM, right: reaction with  $C_0 = 273$  mM.

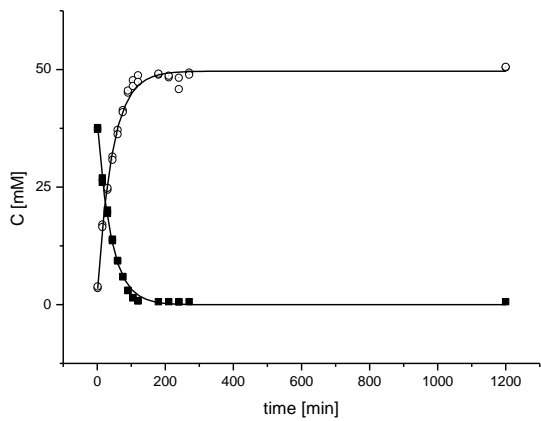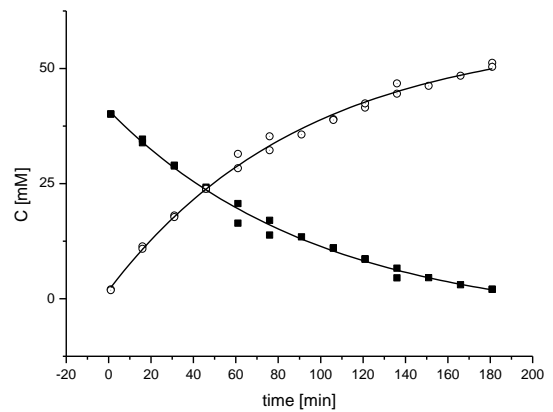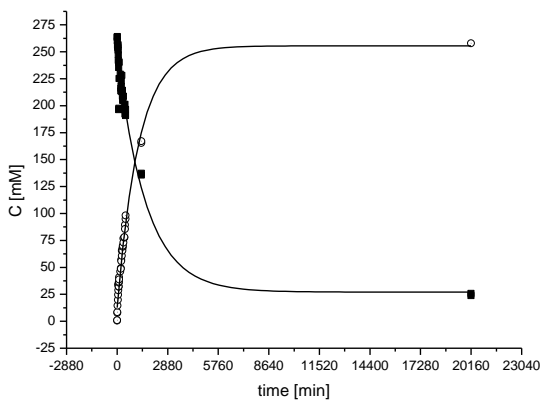

Fig. S4I *p*-Bromoacetophenone reduction progress curves (squares - substrate, circles – product). Top: reactions with  $C_0 = 52$  and  $50$  mM, bottom: reaction with  $C_0 = 275$  mM.

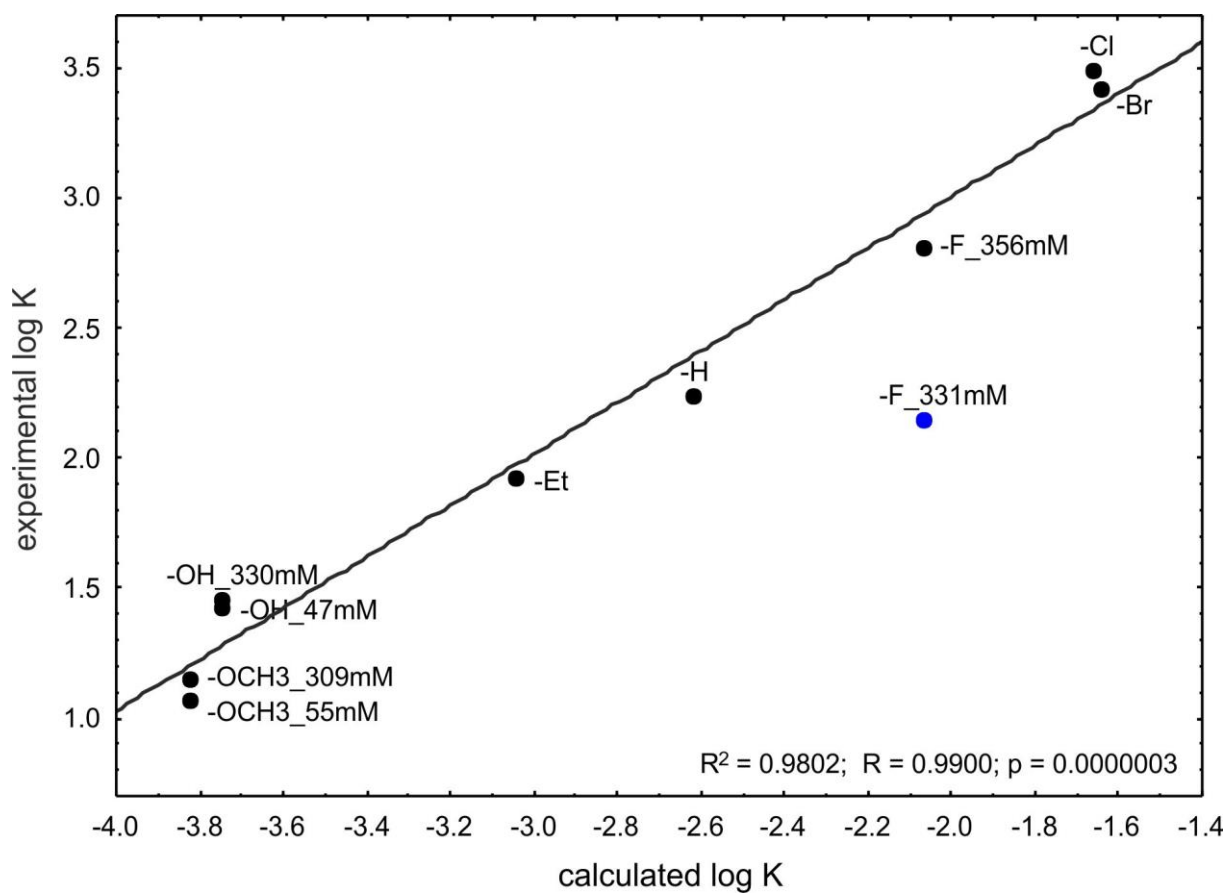

Figure S5. Correlation plot of calculated log K with log K estimated from batch reactor tests. The indexes at the point description provide initial concentration of the reactor in case of multiple runs for a particular substrate. The reactor with p-F-acetophenone ( $C_0=331$  mM, blue circle) was excluded from the analysis as the reaction progress was not followed until equilibrium which results with underestimation of the experimental log K.

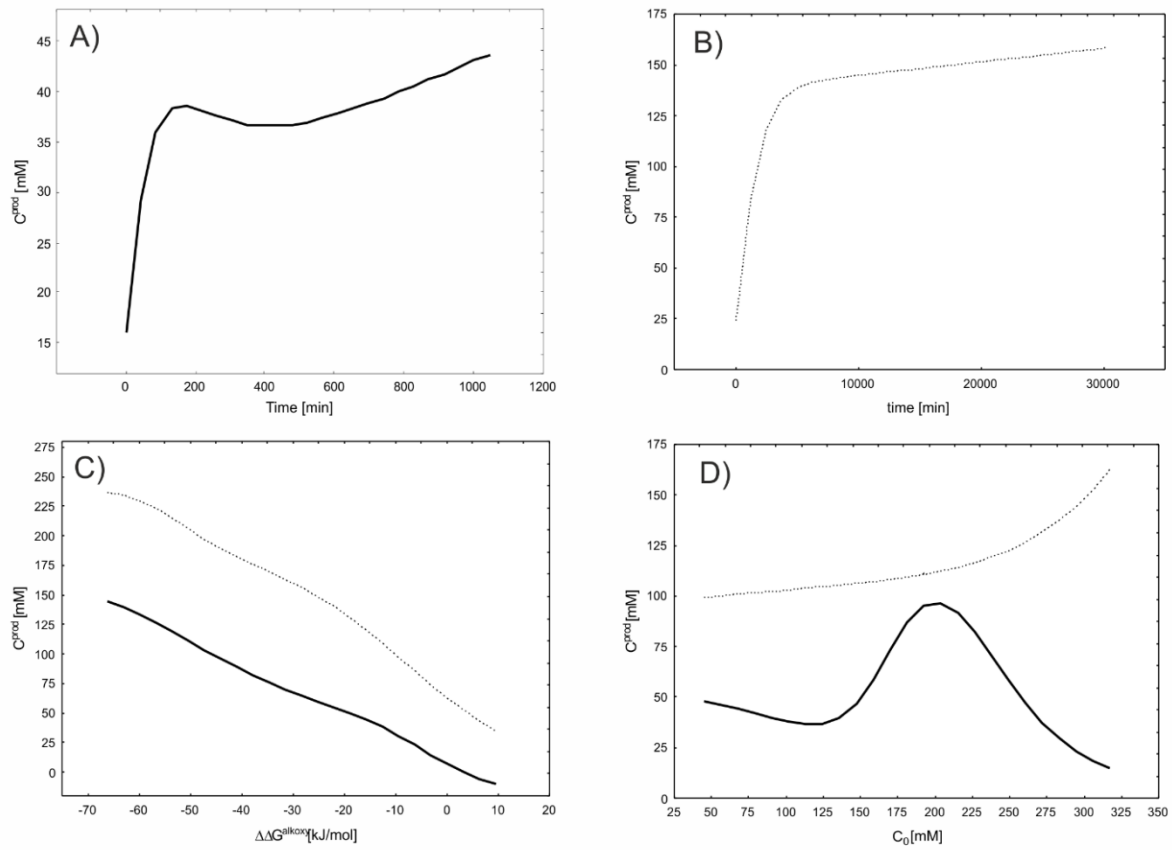

Fig. S6 Response curves for model 1 (dots) and model 2 (solid line) showing dependence of product concentration from: A) and B) reaction time, C)  $\Delta\Delta G^{alkoxy}$  and D) initial substrate concentration  $C_0$ . The response curves are generated as a 2D projection of model behavior provided all the other input variables are constant at their average values for the given dataset.

## Generation of the points for ANN modeling

In order to avoid modeling artifacts derived from uneven data collection during long-lasting experiments, the experimental product concentrations were fitted with the equation  $C(t)=C_0+A_1e^{-(t/k_1)}$  and new concentration vs. time points were generated depending on the total time of the conversion experiment (160 and 80 points for reaction with 300 and 50 mM substrate initial concentration, respectively). For all 7 batch reactions with app. 300 mM initial substrate concentrations, a uniform duration of the reaction (30240 min., 504 h) was generated with mono-exponential equations that were fitted to experimental data. This selected time corresponded to the duration of the longest-lasting reaction recorded in the lab. For each progress curve 160 data points were generated. The initial 120 of these points were placed in even distribution from the start of the reaction curve until the reaction reached the saturation plateau, whereas another 40 data points were used to indicate the saturated part of the progress curve up to the time limit at 504 h. An analogous procedure was used for modeling of 15 progress curves of reactions with initial concentrations of 50 mM where the uniform time of reaction was set to 885 min. The initial part of these curves was indicated by 60 evenly distributed points, while the saturation plateau was indicated by 20 more data points.

The applied procedure yielded 2320 individual model runs (1120 for reactions with  $C_0 = 300$  mM and 1200 with  $C_0 = 50$  mM). These were randomly divided into training, validation and test subsets in which a 2:1:1 ratio was performed.

## Parameters of neural models

Each of neural models utilized the same architecture, i.e. 3 input neurons, 5 neurons in a hidden layer and one output neuron (Fig. S7). Each of the input neurons (1.1-1.3) introduced the input variable into the model and performed a minmax normalization of its value to the 0-1 range. Each of the input neurons transmits its normalized value to every hidden neuron (2.1-2.5). In turn each of the hidden neurons conducts signal aggregation by means of linear combination of inputs  $\varphi = \sum_{i=0}^n w_i x_i^k + \theta$ .

The applied constants (weights and threshold  $\theta$ ) of the aggregation functions  $\varphi$  are collected in Table S8 for model 1 and S9 for model 2. The result of signal aggregation was used as an argument of a

hyperbolic activation function  $\psi = \frac{e^x - e^{-x}}{e^x + e^{-x}}$  yielding results in the range of (-1,+1). Results (activation level) of each neuron of the hidden layer were subsequently transmitted to the output neuron (3.1)

and subjected to another linear aggregation function  $\varphi$  (consents Table S7 for model 1 and S8 form

model 2) and logistic activation function  $\vartheta = \frac{1}{1+e^{-x}}$ .

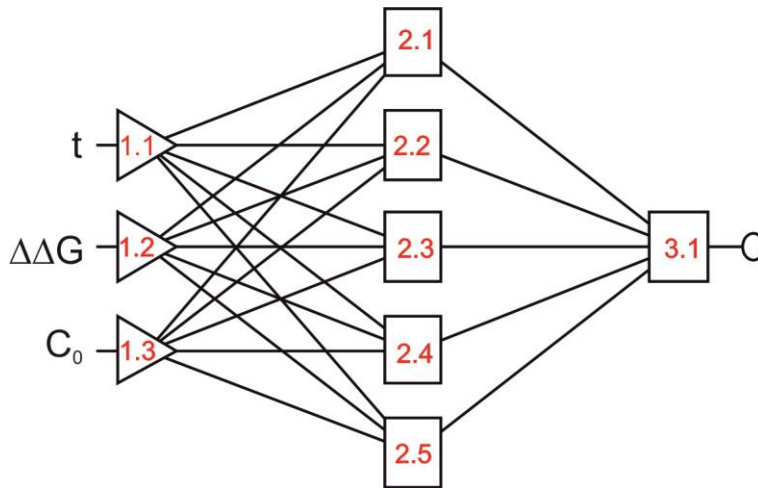

Table S7. Neural weights and threshold constants of aggregation functions of ANN model 1.

| Neuron number                        | 2.1      | 2.2       | 2.3      | 2.4      | 2.5       | 3.1      |
|--------------------------------------|----------|-----------|----------|----------|-----------|----------|
| <b>Threshold <math>\theta</math></b> | -0.8501  | 0.844192  | -0.84359 | 0.23543  | -0.340169 | 1.22069  |
| 1.1                                  | -12.1457 | -0.080186 | 0.02886  | -1.28608 | -0.116256 |          |
| 1.2                                  | -2.1693  | 1.374649  | -1.23743 | -4.45710 | 0.465425  |          |
| 1.3                                  | 0.4429   | -0.025585 | 0.29380  | 3.02404  | 0.061103  |          |
| 2.1                                  |          |           |          |          |           | -3.39422 |
| 2.2                                  |          |           |          |          |           | -2.06977 |
| 2.3                                  |          |           |          |          |           | 1.59749  |
| 2.4                                  |          |           |          |          |           | 1.60051  |
| 2.5                                  |          |           |          |          |           | -0.53216 |

Table S8. Neural weights and threshold constants of aggregation functions of ANN model 2.

| Neuron number                        | 2.1       | 2.2      | 2.3       | 2.4      | 2.5      | 3.1      |
|--------------------------------------|-----------|----------|-----------|----------|----------|----------|
| <b>Threshold <math>\theta</math></b> | -0.468157 | 0.55927  | 4.775499  | 0.56061  | 3.89830  | 0.67296  |
| 1.1                                  | 9.192675  | -2.47865 | -0.547622 | -1.13774 | 2.50739  |          |
| 1.2                                  | 0.772571  | -2.39801 | 4.323864  | -1.38222 | -3.24668 |          |
| 1.3                                  | -0.138809 | 6.63746  | 3.494382  | 2.67944  | 2.50640  |          |
| 2.1                                  |           |          |           |          |          | 4.02915  |
| 2.2                                  |           |          |           |          |          | 2.44843  |
| 2.3                                  |           |          |           |          |          | -2.00548 |
| 2.4                                  |           |          |           |          |          | -1.26648 |
| 2.5                                  |           |          |           |          |          | 4.68064  |



Table S9 Results of calculation of binding energies. BE – binding energy calculated as a difference of the energy of the protein-ligand complex versus the sum of energies of ligand and protein alone. TBE – total binding energy is BE corrected for ligand conformational energy fractions. TBE +  $\Delta S$  - total binding energy corrected for entropic energy fractions (entropy of binding calculated as a difference of entropy of the protein-ligand complex versus the sum of entropies of free protein and ligand).

| No | Substrate / pose                          | BE<br>kJ/mol | TBE<br>kJ/mol | TBE +<br>$\Delta S$<br>kJ/mol. | Ligand<br>Energy<br>(kJ/mol) | Protein<br>Energy<br>(kJ/mol) | Complex<br>Energy<br>(kJ/mol) | Entropic<br>Energy<br>(kJ/mol) | Ligand<br>Conformational<br>Energy (kJ/mol) | Ligand<br>Conformational<br>Entropy (kJ/mol-<br>K) |
|----|-------------------------------------------|--------------|---------------|--------------------------------|------------------------------|-------------------------------|-------------------------------|--------------------------------|---------------------------------------------|----------------------------------------------------|
| 1  | Acetophenone<br>Prelog                    | -101.5       | -100.0        | -29.3                          | 23.5                         | -6775.2                       | -6853.1                       | 70.5                           | 1.7                                         | 1.7                                                |
| 1  | Acetophenone<br>anti-Prelog               | -78.3        | -76.6         | -6.3                           | 11.3                         | -6775.2                       | -6842.2                       | 70.4                           | 1.7                                         | 1.7                                                |
| 7  | 4'-acetylbiphenyl                         | -117.6       | -112.5        | -36.0                          | 51.8                         | -6775.2                       | -6841.0                       | 76.4                           | 5.1                                         | 5.1                                                |
| 21 | 4'-aminoacetophenone<br>Prelog            | -116.1       | -114.6        | -42.7                          | 13.3                         | -6775.2                       | -6878.0                       | 71.8                           | 1.7                                         | 1.7                                                |
| 21 | 4'-aminoacetophenone<br>anti-Prelog       | -82.6        | -80.8         | -9.2                           | 9.5                          | -6775.2                       | -6848.2                       | 71.8                           | 1.7                                         | 1.7                                                |
| 22 | 4'-<br>hydroxyacetophenone<br>Prelog      | -118.3       | -116.7        | -44.8                          | 17.7                         | -6775.2                       | -6875.7                       | 71.8                           | 1.7                                         | 1.7                                                |
| 22 | 4'-<br>hydroxyacetophenone<br>anti-Prelog | -86.6        | -84.9         | -13.0                          | 13.3                         | -6775.2                       | -6848.4                       | 71.8                           | 1.7                                         | 1.7                                                |
| 28 | 2,4'-<br>dichloroacetophenone             | -118.4       | -114.2        | -38.9                          | 21.5                         | -6775.2                       | -6872.0                       | 75.6                           | 4.1                                         | 4.1                                                |
| 29 | 2,2,2-<br>trifluoroacetophenone           | -120.5       | -112.5        | -38.5                          | 34.1                         | -6775.2                       | -6861.6                       | 74.0                           | 7.9                                         | 7.9                                                |
| 43 | methyl 4-<br>fluorobenzoylacetate         | -194.3       | -184.1        | -107.9                         | 15.4                         | -6775.2                       | -6954.0                       | 76.3                           | 10.3                                        | 6.6                                                |
